# Supplementary material for: Fission yeast tropomyosin specifies directed transport of myosin-V along actin cables
Source: PubMed Central journal article supplement — Mol Biol Cell. 2014 Jan 1;25(1):66–75. doi: 10.1091/mbc.E13-04-0200 (PMC3873894; doi:10.1091/mbc.e13-04-0200), 2014-01-01
Supplement: supp_E13-04-0200v1_CombinedSupMats.pdf [file supp_E13-04-0200v1_CombinedSupMats.pdf]

# Supplemental Materials

*Molecular Biology of the Cell*

Clayton et al.

# **SUPPLEMENTARY MATERIAL**

## **Fission yeast tropomyosin specifies directed transport of myosin-V along actin cables**

Joseph E. Clayton<sup>\*</sup>, Luther W. Pollard<sup>\*</sup>, Maria Skolnick<sup>\*</sup>, Carol S. Bookwalter<sup>\*</sup>, Alex R. Hodges<sup>\*†</sup>,  
Kathleen M. Trybus<sup>\*‡</sup> & Matthew Lord<sup>\*‡</sup>

<sup>\*</sup>Department of Molecular Physiology & Biophysics  
University of Vermont  
Burlington, VT 05405  
USA

<sup>†</sup>Current address: Department of Chemistry & Physical Sciences, Quinnipiac University, Hamden, CT 06518. USA.

<sup>‡</sup>Corresponding authors: [matthew.lord@uvm.edu](mailto:matthew.lord@uvm.edu); Tel. 802-656-9898, Fax. 802-656-0747;  
[kathleen.trybus@uvm.edu](mailto:kathleen.trybus@uvm.edu) Tel. 802-656-8750, Fax. 802-656-0747.

*Running head:* Tropomyosin sorts myosin-V function.

## Supplementary Movie Legends

**Movie 1.** Cdc8p-decorated actin filaments support the processive movement of single Myo52p-Qdot molecules.

*Left:* Failure of Myo52p-HMM-Qdots (green) to move processively on bare actin filaments (red) in the presence of 2 mM ATP. *Right:* In contrast, Myo52p-HMM-Qdots can move processively on Cdc8p-decorated actin filaments. Data were collected using TIRF microscopy with a capture rate of 30 frames/s and are played back at this speed. Scale bar: 2  $\mu$ m.

**Movie 2.** Cdc8p-decorated actin filaments support the processive movement of single Myo52p-Cy3 molecules.

Cy3-labeled Myo52p-HMM (green) moving processively on actin-Cdc8 filaments (red) in the presence of 2 mM ATP. Data were collected using TIRF microscopy with a capture rate of 5 frames/s and are played back at this speed. Scale bar: 2  $\mu$ m.

**Movie 3.** Processive movement of Myo52p molecules on bare actin and Cdc8p-decorated actin filaments at low concentrations of ATP.

*Left:* A Myo52p-HMM-Qdot (green) moving processively on bare actin filaments (red) in the presence of 10  $\mu$ M ATP. *Right:* Myo52p-HMM-Qdots moving processively on Cdc8p-decorated actin filaments in 10  $\mu$ M ATP. Data were collected using TIRF microscopy with a capture rate of 1 frame/s and are played back at 30 frames/s (sped-up 30x). Scale bar: 2  $\mu$ m.

**Movie 4.** Cdc8p-decorated actin filaments support movement of Qdots by multiple Myo52p molecules.

*Left:* Failure of Qdots (green) bound by multiple Myo52p-HMM motors to move along bare actin filaments (red) in the presence of 2 mM ATP. *Right:* In contrast, Qdots bound by multiple Myo52p-HMM motors can move processively on Cdc8p-decorated actin filaments. Data were collected using TIRF microscopy with a capture rate of 30 frames/s and are played back at this speed. Scale bar: 2  $\mu$ m.

**Movie 5.** The directed motility of Myo52p molecules in the cell does not rely on the C-terminal cargo-binding domain.

In vivo directed motility of Myo52p $\Delta$ CBD-3xGFP particles (green) made from clusters of molecules lacking their C-terminal cargo-binding domains in the *myo52 $\Delta$ CBD-3xGFP* strain. Data were collected using epi-fluorescence microscopy with a capture rate of 10 frames/s; played back at 100 frames/s (sped up 10x).

## Supplementary Figures and Legends

### Supplementary Figure S1.

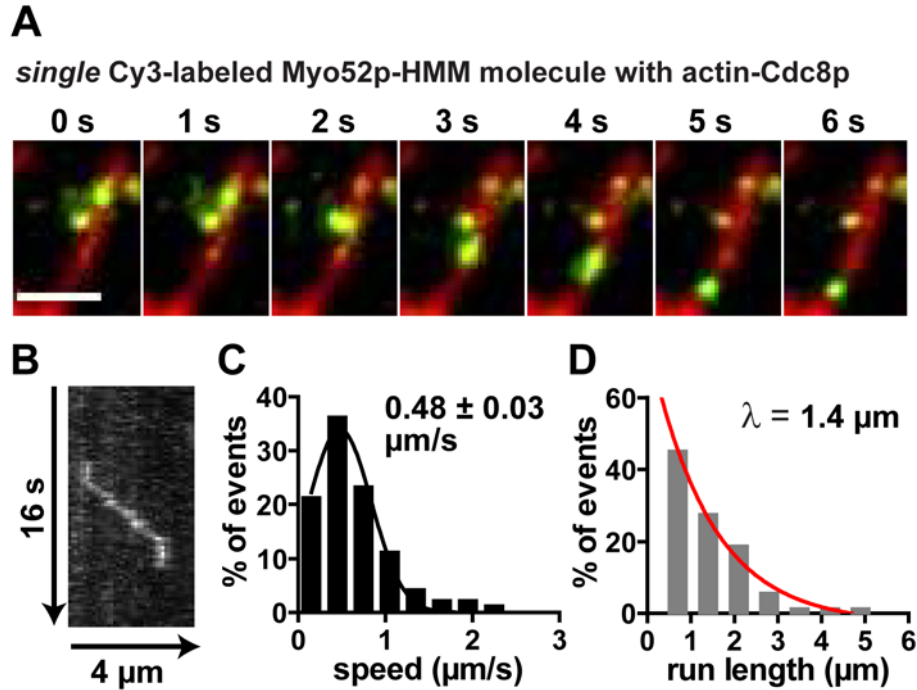

**Figure S1.** Cy3-labeled Myo52p molecules move processively along actin-Cdc8p filaments. Single Myo52p-HMM molecules were coupled to Cy3 in order to track their ability to move along Alexa 635-phalloidin-labeled actin filaments using TIRF microscopy. A) Movement of a representative Myo52p-Cy3 molecule (green) along a Cdc8p-decorated actin filament (red). Bar: 2 μm. Other representative events are presented in Supplementary Movie 2. B) Representative kymograph summarizing a typical Myo52p-Cy3 run along an actin-Cdc8p filament. C) Histogram summarizing the distribution of Myo52p-Cy3 speeds (n=100). D) Histogram of run lengths for Myo52p-Cy3 along Cdc8p-decorated actin tracks (n=114). The red curve shows the exponential fit ( $y = Ae^{-x/\lambda}$ ) to determine the run length  $\lambda$ .

Supplementary Figure S2.

**A**

*multiple Myo52p-HMM with actin-Cdc8p*

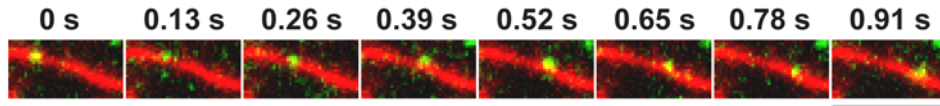

**B**

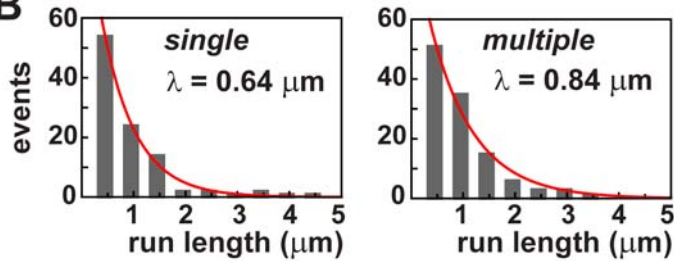

**Figure S2.** Cdc8p activates the motility of fluorescence Qdots coated with multiple Myo52p motors. Qdots were saturated with Myo52p-HMM molecules (yielding ~3-5 motors/Qdot) to track the ability of multiple Myo52p molecules to support movement along rhodamine phalloidin-labeled actin filaments using TIRF microscopy. Only actin filaments decorated with tropomyosin (Cdc8p) supported movement of these Myo52p-coated Qdots. A) Movement of a representative Myo52p-coated Qdot (green) along a Cdc8p-decorated actin filament (red). Bar: 4  $\mu\text{m}$ . Other representative events are presented in Supplementary Movie 4. B) Histograms comparing run lengths of Qdots associated with single (n=103) versus multiple (n=117) Myo52p molecules along Cdc8p-decorated actin tracks. The red curves show exponential fits ( $y = Ae^{-x/\lambda}$ ) to determine the run length  $\lambda$ .

Supplementary Figure S3.

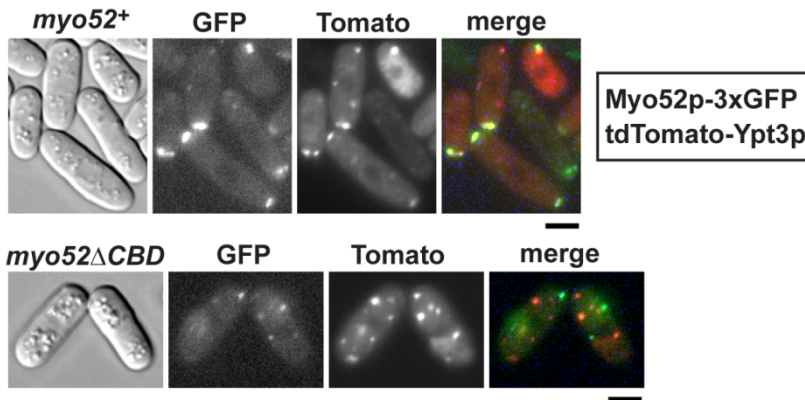

**Figure S3.** The cellular function of Myo52p relies on its C-terminal cargo-binding domain. Wild-type *myo52-3xGFP* and mutant *myo52ΔCBD-3xGFP* cells were grown at 25°C in YE5S rich media prior to microscopic imaging. Representative DIC and epi-fluorescence images showing the localization of Myo52p-3xGFP or Myo52p $\Delta$ CBD-3xGFP (GFP) and a Myo52p cargo (GTPase Ypt3p, Tomato-Ypt3p) in wild-type and mutant cells. Unlike in wild-type cells, Ypt3p is not transported with Myo52p to sites of polarized growth in the absence of the cargo-binding domain. Bars: 4  $\mu$ m.

Supplementary Figure S4.

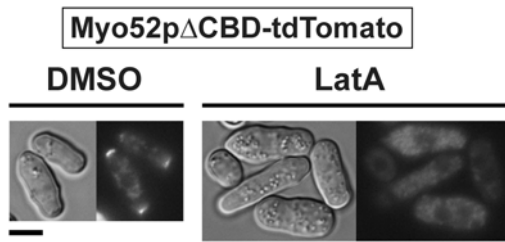

**Figure S4.** Polarized localization of truncated Myo52p lacking its cargo-binding domain relies on actin filaments.

*myo52 $\Delta$ CBD-tdTomato* cells were grown at 25°C in YE5S rich media prior to imaging. Representative DIC and fluorescence micrographs show the sub-cellular localization of Myo52p $\Delta$ CBD-tdTomato upon treatment with DMSO (control, left) or 10  $\mu$ M Latrunculin A (right). Bar: 4  $\mu$ m.
